# Supplementary material for: Msh Pilus Mutations Increase the Ability of a Free-Living Bacterium to Colonize a Piscine Host
Source: Preprints.org preprint supplement (doi:10.20944/preprints202012.0391.v1), 2020-12-15
Supplement: Supplementary file 1 [file 20200922_unique mutations, All assessed isolates_09Feb2019_RevB.xlsx]

## Sheet: Mutations
Line 1				Line 2				Line 3				Line 4				Line 5				Line 6								Caption
A	B	C	D	A	B	C	D	A	B	C	D	A	B	C	D	A	B	C	D	A	B	C	D	Gene	Mutation	Description	Annotation	Table S2: Evolved mutations. Mutations for each of six replicate evolved populations after serial passage are shown. A-D indicate that four isolates were collected from each replicate population and sequenced. Red and green shading of isolates indicates that each isolate contained a neutral dTomato or green fluorescent protein tag; used to facilitate detection of selective sweeps [7]. X indicates…
										X	X													mshL ←	C→A	E75*	MSHA biogenesis protein MshL
		X	X			X	X	X	X					X	X									mshL ←	T→G	T300P	MSHA biogenesis protein MshL
X	X											X	X											mshG ←	G→T	A289E	MSHA biogenesis protein MshG
																				X	X	X	X	mshE ←	G→A	Q196*	MSHA biogenesis protein MshE
																X								mshE ←	C→A	E83*	MSHA biogenesis protein MshE
					X																			mshO ←	Δ1 bp	541/849 nt	MSHA biogenesis protein MshO
			X																					00112 →	G→A	E27K	hypothetical protein
													X											00235 ←	G→T	G137G	Sulfite exporter TauE/SafE
								X												X				00301 →	A→G	K37R	hypothetical protein
								X												X				00301 →	G→T	T41T	hypothetical protein
								X												X				00301 →	G→A	E50E	hypothetical protein
								X												X				00301 →	T→G	L52L	hypothetical protein
								X												X				00301 →	G→A	E65E	hypothetical protein
								X												X				00301 → / ← 00302	T→A	intergenic (+5/+81)	hypothetical protein/Suppressor of fused protein (SUFU)
																	X	X	X					rcsC_1 →	G→A	A304T	Sensor histidine kinase RcsC
									X									X	X		X	X	X	00448 →	C→A	Q182K	Transposase DDE domain protein
									X									X	X		X	X	X	00448 →	C→T	I215I	Transposase DDE domain protein
									X									X	X		X	X	X	00448 →	T→C	T285T	Transposase DDE domain protein
									X									X	X		X	X	X	00448 →	C→T	N293N	Transposase DDE domain protein
																		X	X		X	X	X	00448 →	A→C	V154V	Transposase DDE domain protein
																		X	X		X	X	X	00448 →	C→A	V171V	Transposase DDE domain protein
		X																						00582 ← / ← proS	C→A	intergenic (‑167/+109)	Patatin‑like phospholipase/Proline‑‑tRNA ligase
							X																	00712 ←	T→C	N23D	hypothetical protein
								X				X								X				00712 ←	2 bp→TT	85‑86/228 nt	hypothetical protein
								X				X								X				00712 ←	T→C	N23D	hypothetical protein
								X				X								X				00712 ←	C→T	L20L	hypothetical protein
								X				X								X				00712 ←	A→G	G18G	hypothetical protein
				X																				dsbA_2 → / → 00890	G→A	intergenic (+778/‑142)	Thiol:disulfide interchange protein DsbA precursor/hypothetical protein
						X			X									X	X		X	X	X	00937 ←	2 bp→GC	59‑60/333 nt	hypothetical protein
						X			X		X							X	X		X	X	X	00937 ←	A→T	V13E	hypothetical protein
						X			X		X							X	X		X	X	X	00937 ←	A→G	I9I	hypothetical protein
						X			X		X							X	X		X	X	X	00937 ←	C→T	R7H	hypothetical protein
						X			X		X							X	X		X	X	X	00937 ←	C→T	M6I	hypothetical protein
						X			X									X	X		X	X	X	00937 ← / ← 00938	C→T	intergenic (‑11/+137)	hypothetical protein/plasmid segregation centromere-binding protein ParG
									X									X	X		X	X	X	00937 ← / ← 00939	2 bp→TG	intergenic (‑38/+109)	hypothetical protein/plasmid segregation centromere-binding protein ParG
X	X											X	X											glpC →	T→G	F257C	oxidoreductase, FAD-binding, putative
																	X							01176 →	T→G	W460G	lipoprotein, putative
							X																	01736 ←	A→G	F149S	Zinc carboxypeptidase
																					X			folD → / ← cysS	(TAGGTTC)14→13	intergenic (+89/+81)	Bifunctional protein FolD protein/Cysteine‑‑tRNA ligase
																	X	X	X					dosC →	(A)6→5	375/1557 nt	Diguanylate cyclase DosC
				X	X																			gmr_6 →	G→A	A174T	Cyclic di‑GMP phosphodiesterase Gmr
								X	X															smc_2 ←	A→G	M446T	Chromosome partition protein Smc
																	X	X	X					02921 →	(A)8→7	1418/2091 nt	hypothetical protein
X																								secY ←	G→C	P355A	protein translocase subunit secY/sec61 alpha
									X									X	X		X	X	X	03772 ←	2 bp→GG	372‑373/444 nt	hypothetical protein
									X									X	X		X	X	X	03772 ←	A→G	D123D	hypothetical protein
									X									X	X		X	X	X	03772 ←	C→T	S122N	hypothetical protein
									X									X	X		X	X	X	03772 ←	T→G	M121L	hypothetical protein
									X									X	X		X	X	X	03772 ←	A→G	S117P	hypothetical protein
									X									X	X		X	X	X	03772 ←	G→A	L115L	hypothetical protein
									X									X	X		X	X	X	03772 ←	G→A	S112S	hypothetical protein
									X									X	X		X	X	X	03772 ←	T→A	L110L	hypothetical protein
									X									X	X		X	X	X	03772 ←	A→C	T109T	hypothetical protein
									X									X	X		X	X	X	03772 ←	G→A	V106V	hypothetical protein
									X									X	X		X	X	X	03772 ←	A→T	G99G	hypothetical protein
								X																04242 →	2 bp→TT	50‑51/576 nt	Integrase core domain protein
								X																04242 →	C→A	P25T	Integrase core domain protein
								X																04242 →	T→C	P25P	Integrase core domain protein
								X																04242 →	A→C	A27A	Integrase core domain protein
								X																04242 →	T→A	F36I	Integrase core domain protein
